# Supplementary material for: Efficient synthesis of highly dispersed ultrafine Pd nanoparticles on a porous organic polymer for hydrogenation of CO2 to formate
Source: Royal Society of Chemistry journal article supplement (doi:10.1039/d0ra01324b), 2020-01-01
Supplement: d0ra01324b1.pdf [file d0ra01324b1.pdf]

## Supporting Information

### **Efficient synthesis of highly dispersed ultrafine Pd nanoparticles on a porous organic polymer for hydrogenation of CO<sub>2</sub> to formic acid**

Xianzhao Shao,<sup>a,\*</sup> Xinyi Miao,<sup>a</sup> Xiaohu Yu,<sup>a</sup> Wei Wang,<sup>a</sup> Xiaohui Ji,<sup>a</sup>

<sup>a</sup>Shaanxi Key Laboratory of Catalysis, School of Chemistry and Environment  
Science, Shaanxi University of Technology, Hanzhong 723001, Shaanxi, China

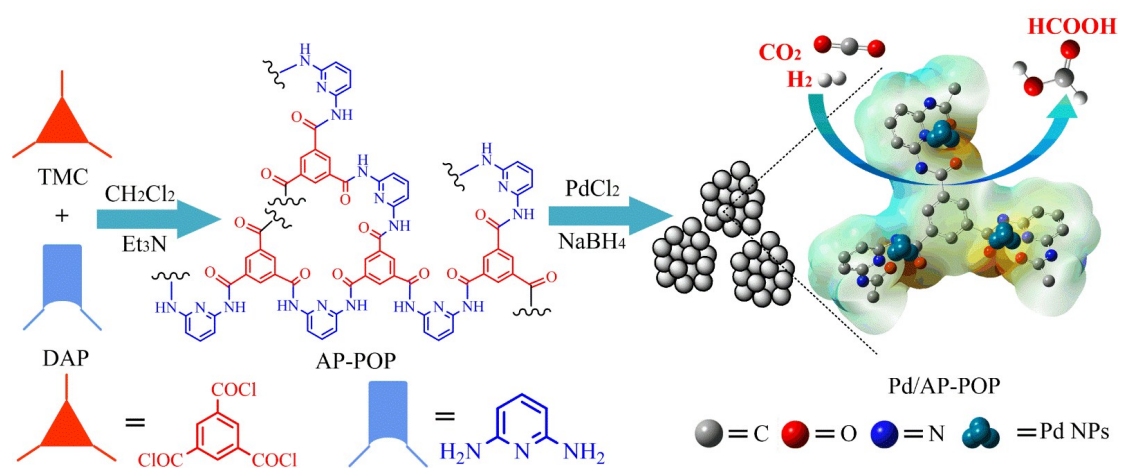

**Scheme S1.** Synthetic route for Pd/AP-POP catalyst.

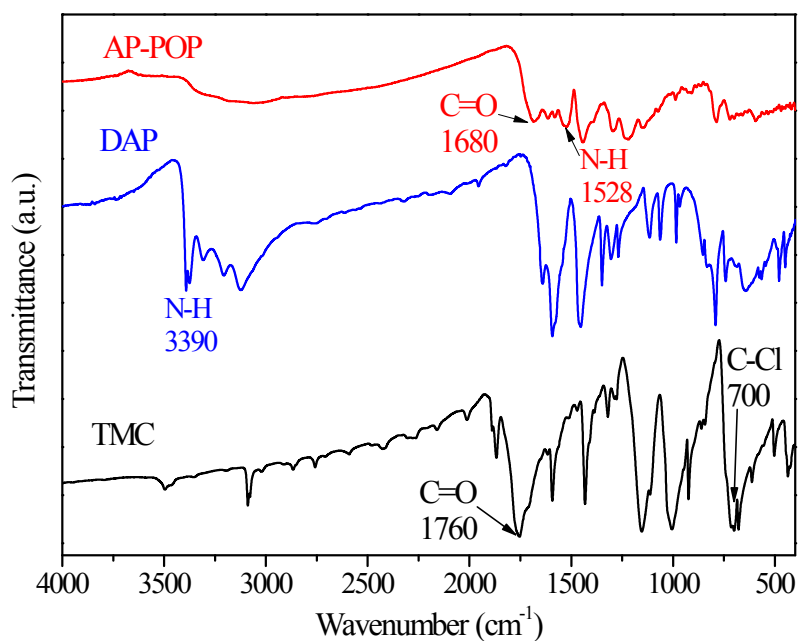

**Figure S1.** FT-IR spectra of the AP-POP, 1,3,5-benzenetricarbonyl chloride (TMC) and 2,6-diaminopyridine (DAP). The absorption bands in between  $1680\text{ cm}^{-1}$  correspond to the amide C=O stretching frequency, also known as amide-I band. The band observed in the range  $1528\text{ cm}^{-1}$  corresponds to NH bending vibration, called amide-II band. No acid chloride ( $700\text{ cm}^{-1}$ ) and amine bands corresponding to the starting compounds appear, demonstrating the complete transformation of starting material to polyamide POPs.

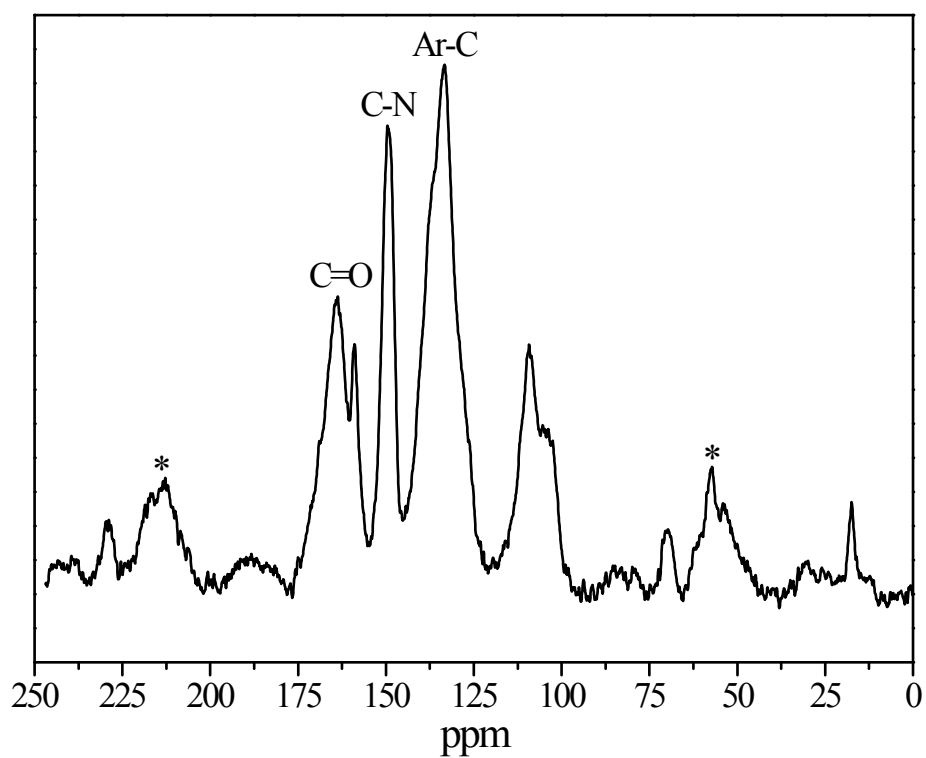

**Figure S2.** The  $^{13}\text{C}$  CP-MAS solid state NMR spectra of AP-POP. A signal at 164 ppm corresponds to the amide carbonyl. The overlapping signals between 109 and 150 ppm correspond to the aromatic carbons from phenyl and pyridyl moieties. \* indicates peaks arising from spinning side bands.

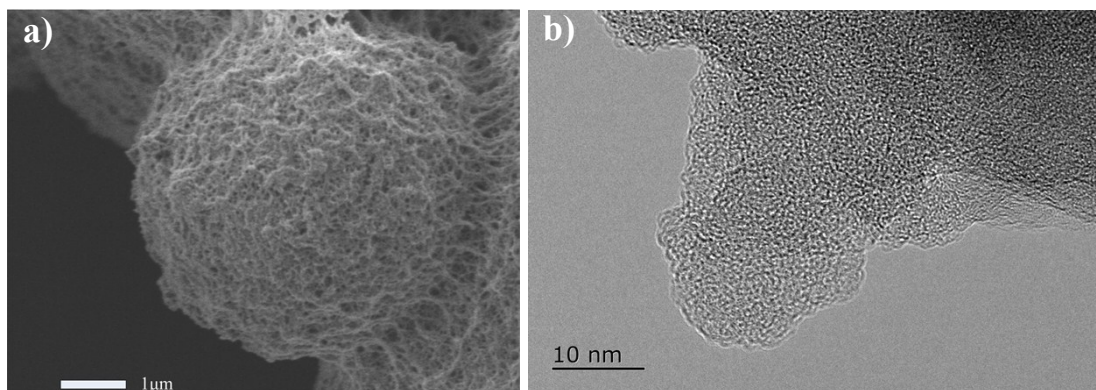

**Figure S3.** SEM and TEM images of AP-POP.

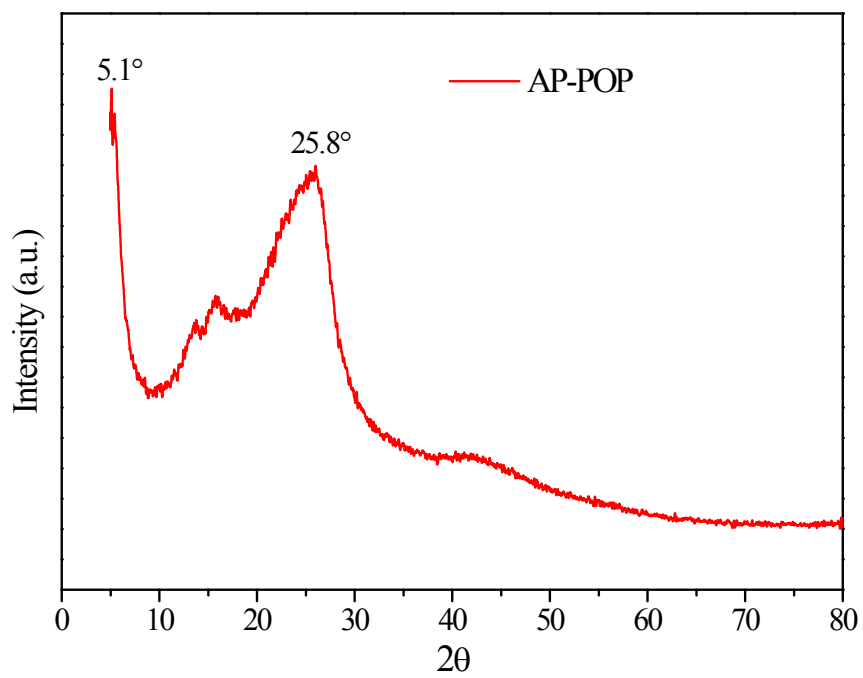

**Figure S4.** The X-ray powder diffraction (XRPD) patterns of AP-POP.

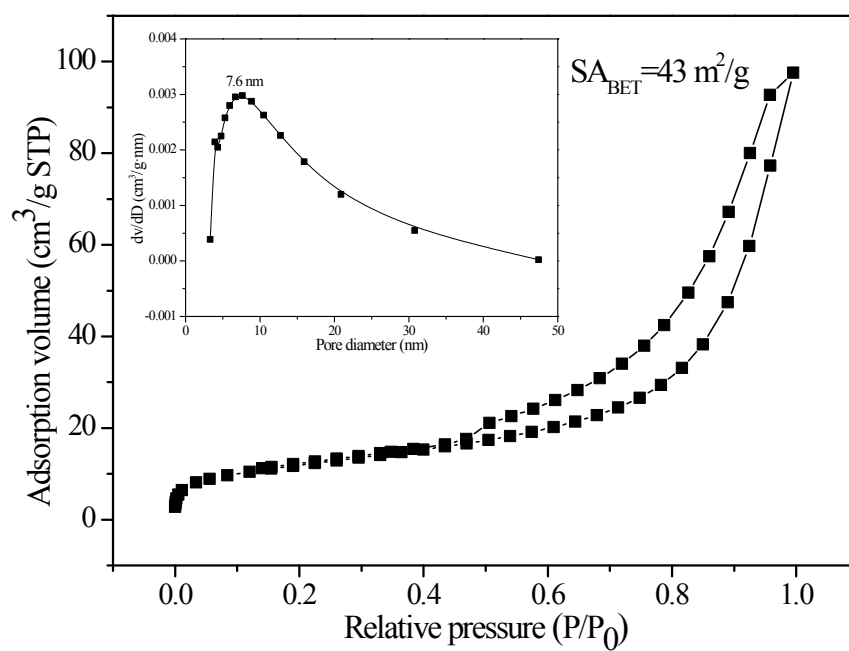

**Figure S5.** N<sub>2</sub> adsorption/desorption isotherms of the AP-POP at 77 K (inset: pore size distribution curves of the AP-POP).

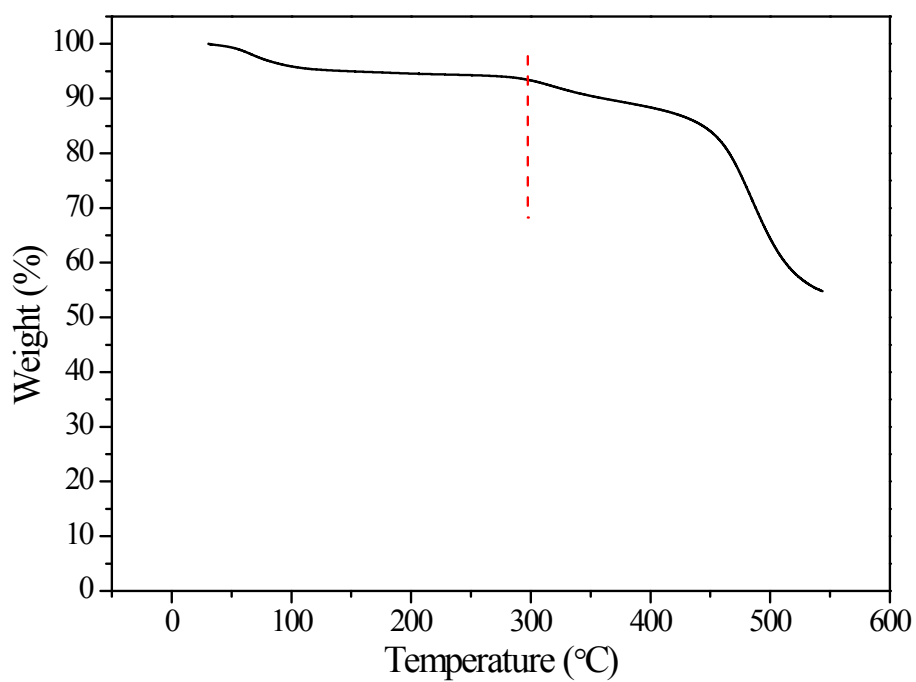

**Figure S6.** Thermogravimetric analysis (TGA) data of AP-POP. The initial weight loss [ $\sim 8\%$ ] of AP-POP in TGA corresponds to the loss of trapped solvent as well as the moisture in the pores. The framework decomposition occurs above  $300\text{ }^{\circ}\text{C}$  with a gradual weight loss of  $40\%$ .



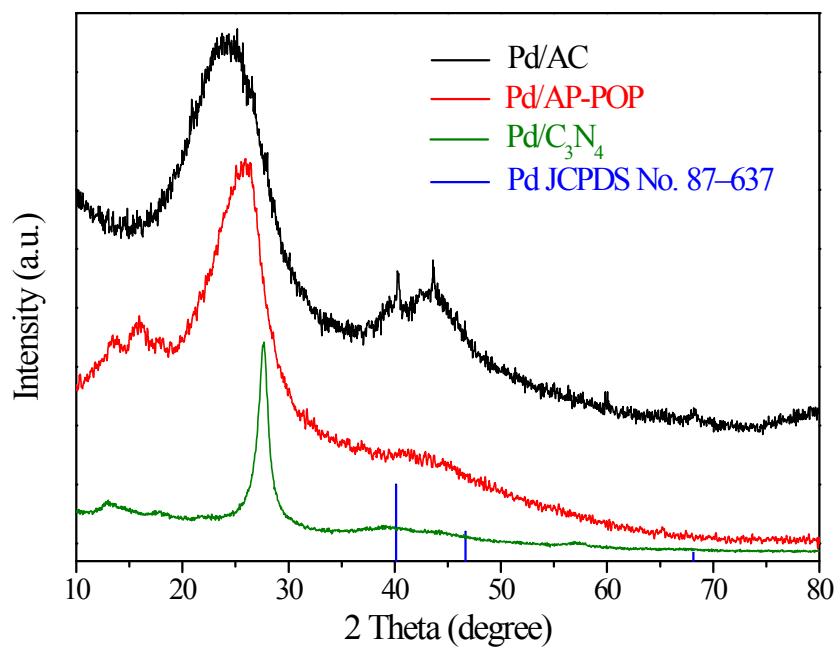

**Figure S7.** XRD patterns of Pd/AP-POP, Pd/AC and Pd/C<sub>3</sub>N<sub>4</sub> catalysts.

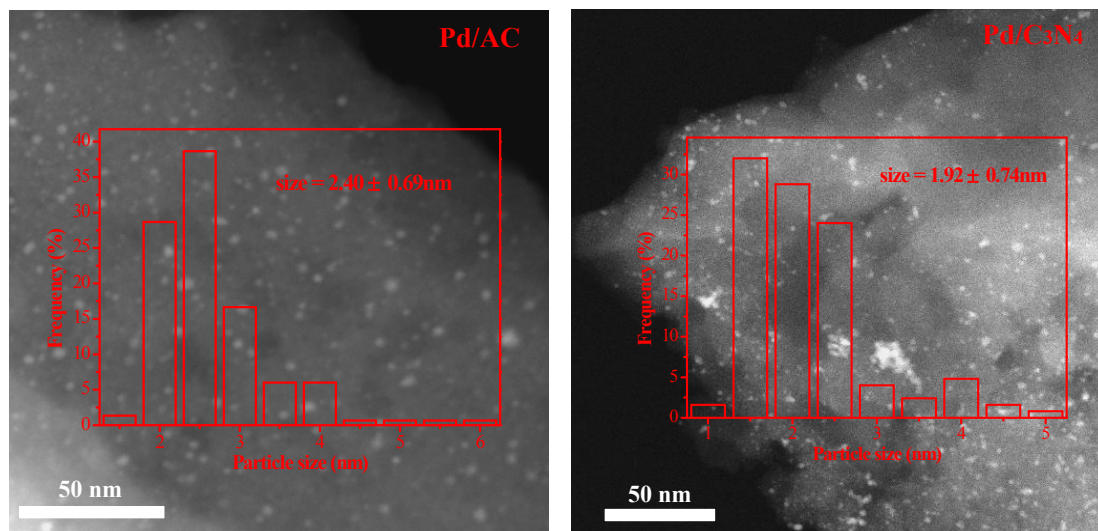

**Figure S8.** TEM images of the Pd/AC and Pd/C<sub>3</sub>N<sub>4</sub> catalysts with the Pd NP size distribution.

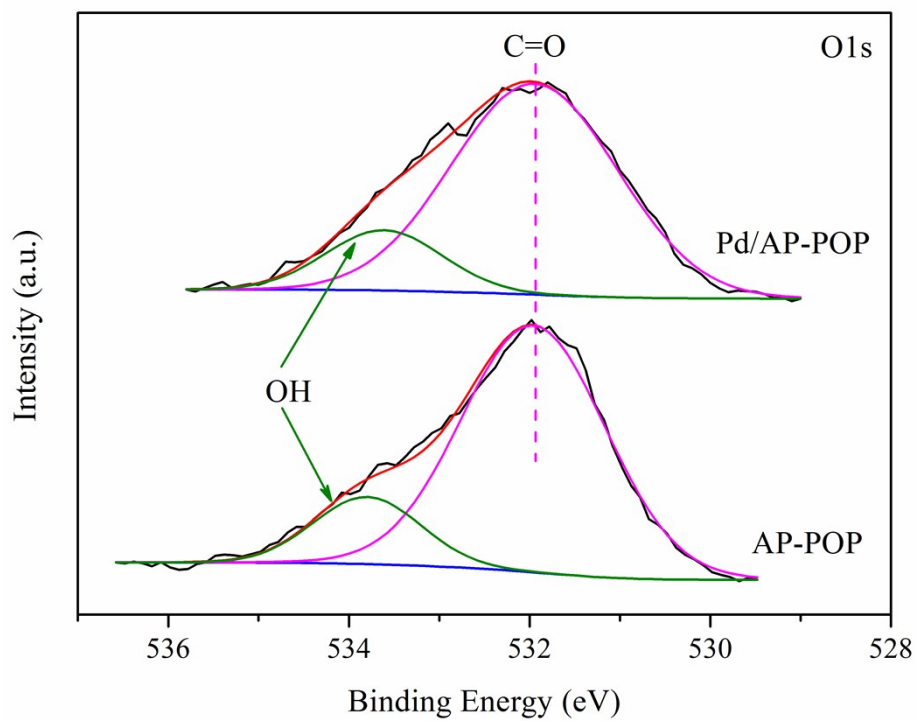

**Figure S9.** The high-resolution spectrum of O 1s of AP-POP and Pd/AP-POP.

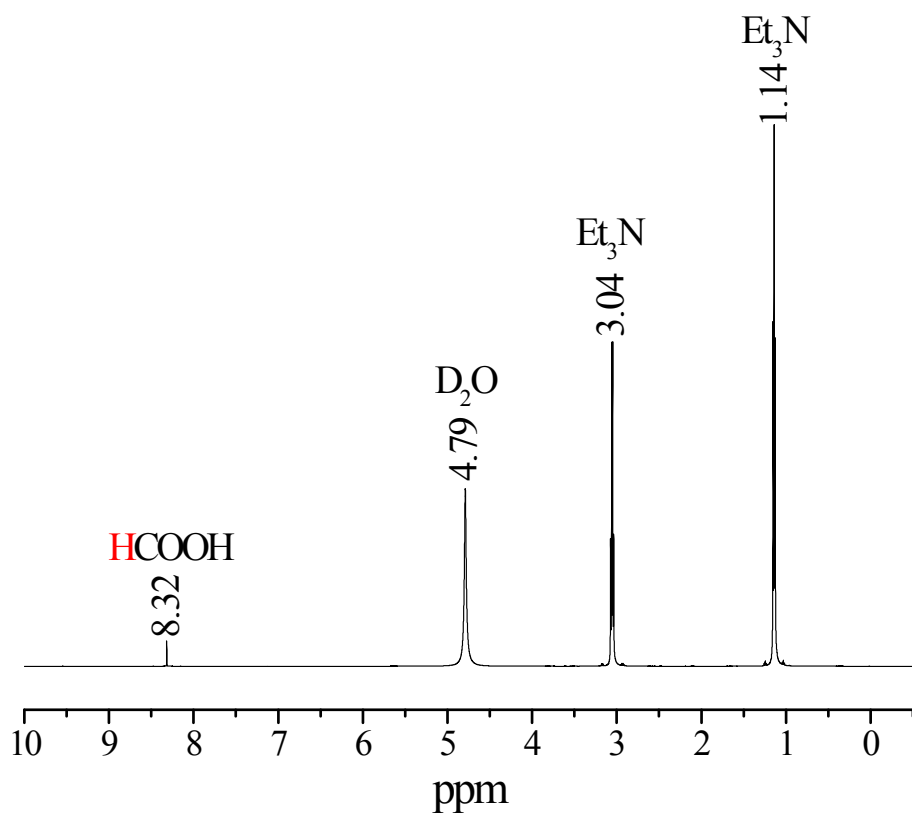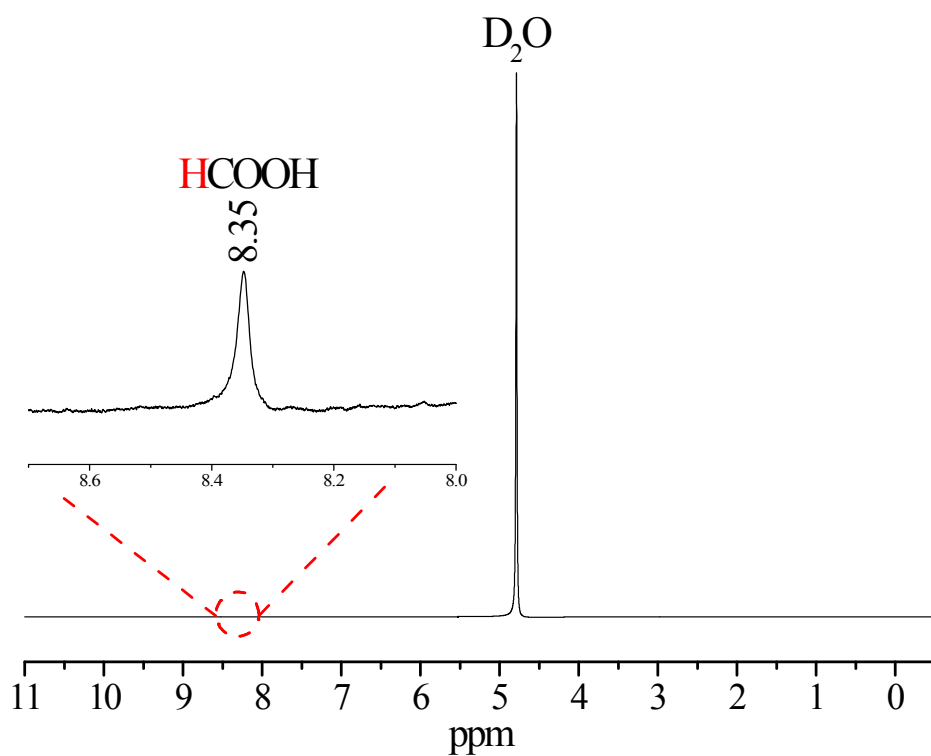

**Figure S10.**  $^1\text{H}$  NMR spectra of a reaction mixture after  $\text{CO}_2$  reduction (with and without  $\text{Et}_3\text{N}$ ).

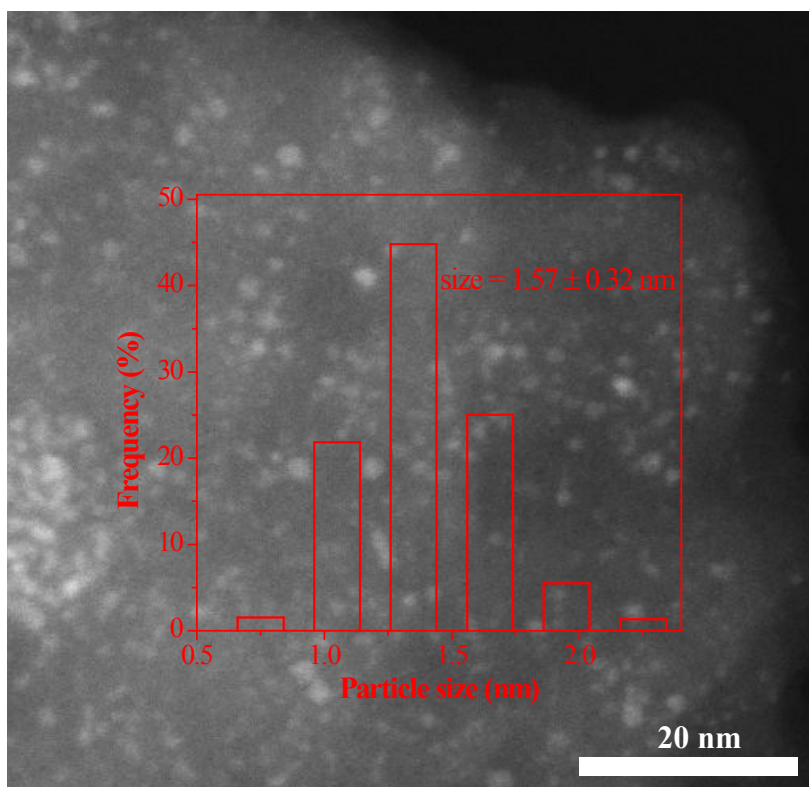

**Figure S11.** STEM images of the used Pd/AP-POP catalyst and Pd NP size distribution.

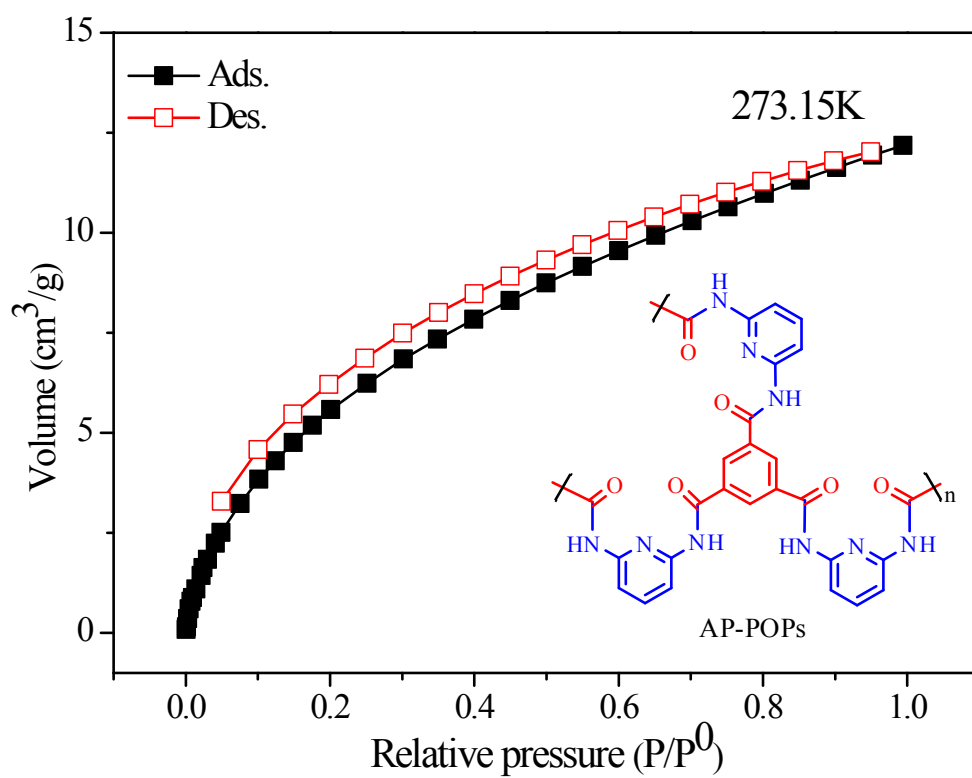

**Figure S12.** Carbon dioxide adsorption isotherms collected at 273 K for AP-POP.

**Table S1.** Chemical composition and textural properties of different materials.

| Materials                  | Elemental analysis <sup>a</sup> (%) |       |      |      | $S_{\text{BET}}^{\text{b}}$<br>( $\text{m}^2\text{g}^{-1}$ ) | Pore size <sup>c</sup><br>(nm) |
|----------------------------|-------------------------------------|-------|------|------|--------------------------------------------------------------|--------------------------------|
|                            | C                                   | N     | H    | Pd   |                                                              |                                |
| AP-POP                     | 57.96                               | 17.75 | 4.22 | none | 43                                                           | 7.8                            |
| Pd/AP-POP                  | 56.85                               | 16.32 | 3.97 | 3.5  | 16                                                           | 10.7                           |
| $\text{C}_3\text{N}_4$     | 38.59                               | 58.83 | 1.02 | none | 99                                                           | 4.0                            |
| Pd/ $\text{C}_3\text{N}_4$ | 37.2                                | 57.14 | 0.94 | 3.3  | 21                                                           | 7.6                            |
| AC                         | 76.5                                | 0.65  | 1.9  | none | 631                                                          | 2.8                            |
| Pd/AC                      | 75.13                               | 0.57  | 1.52 | 3.2  | 517                                                          | 2.9                            |

[a] Elemental analysis of C, H and N was carried out by using a PerkinElmer 2400 instrument. Pd content was quantified by ICP-OES. [b] Brunauer–Emmett–Teller (BET) method. [c] The average pore sizes calculated from the adsorption branch by using Barrett–Joyner–Halenda (BJH) method.

**Table S2.** Comparison of the activity in the transformation of CO<sub>2</sub> to FA in the pure water condition.

| Catalysts                            | T [°C] | Time [h] | Pressure(H <sub>2</sub> /CO <sub>2</sub> ) | TON | TOF  | Ref.      |
|--------------------------------------|--------|----------|--------------------------------------------|-----|------|-----------|
| Pd/AP-POP                            | 80     | 12       | 3.0/3.0 [MPa]                              | 128 | 10.7 | This work |
| PdAg/amine-RF10                      | 40     | 24       | 2.0/2.0 [MPa]                              | 63  | 2.6  | 1         |
| PdNi/CNT                             | 40     | 16       | 25/25 [bar]                                | 3   | 0.2  | 2         |
| 0.6Pd/C <sub>3</sub> N <sub>4</sub>  | 40     | 16       | 25/25 [bar]                                | 24  | 1.5  | 3         |
| 2Pd/ECN                              | 40     | 16       | 2.5/2.5 [MPa]                              | 35  | 2.2  | 4         |
| RuCl <sub>2</sub> (PTA) <sub>4</sub> | 60     | 16       | 25/25 [bar]                                | 158 | 9.9  | 5         |

#### Reference

- [1] S. Masuda, K. Mori, Y. Kuwahara and H. Yamashita. *J. Mater. Chem. A*, **2019**, 7, 16356–16363.
- [2] L. T. M. Nguyen, H. Park, M. Banu, J. Y. Kim, D. H. Youn, G. Magesh, W. Y. Kim, and J. S. Lee, *RSC Adv.*, **2015**, 5, 105560–105566.
- [3] H. Park, J. H. Lee, E. H. Kim, K. Y. Kim, Y. H. Choi, D. H. Youn and J. S. Lee, *Chem. Commun.*, **2016**, 52, 14302–14305.
- [4] C. Mondelli, B. Purlas, M. Ackermann, Z. Chen and J. P. Ramírez, *ChemSusChem*, **2018**, 11, 2859–2869.
- [5] S. Moret, P. J. Dyson and G. Laurenczy, *Nat. Commun.*, **2014**, 5, 4017.
